# Supplementary material
Source: publisher figshare collection journal article supplement (https://karger.figshare.com/articles/dataset/_/5129317)
Supplement: Supplementary file 1 [file 1]

**Supplement Table 2. Change in cognitive test scores in people with a stroke or TIA versus people without a stroke or TIA by levels of education.**

|                                                              | n/N <sup>a</sup> | Stroop<br>interference task<br>(seconds) | LDST<br>(correct answers) | VFT<br>(animal names) | 15-WLT-<br>Immediate recall<br>(correct answers) | 15-WLT-Delayed<br>recall (correct<br>answers) | Purdue Pegboard<br>(number of pins<br>placed) |
|--------------------------------------------------------------|------------------|------------------------------------------|---------------------------|-----------------------|--------------------------------------------------|-----------------------------------------------|-----------------------------------------------|
| Difference in change in cognition (95% confidence intervals) |                  |                                          |                           |                       |                                                  |                                               |                                               |
| Low education                                                | 73/1687          | 3.52 (-0.56; 7.61)                       | -0.40 (-1.39; 0.58)       | -0.55 (-1.57; 0.47)   | -1.73 (-3.05; -0.41)                             | -0.56 (-1.14; 0.01)                           | -0.05 (0.81; -0.40)                           |
| Intermediate education                                       | 89/2673          | 3.30 (0.49; 6.11)                        | -0.77 (-1.62; 0.09)       | -0.77 (-1.70; 0.17)   | -0.55 (-1.64; 0.55)                              | -0.58 (-1.09; -0.08)                          | -1.02 (0.31; -0.49)                           |
| High education                                               | 43/1228          | -0.49 (-3.23; 2.25)                      | -1.28 (-2.53; -0.03)      | 0.13 (-1.22; 1.48)    | -0.38 (-1.20; 0.44)                              | 0.00 (-0.38; 0.37)                            | -0.33 (0.13; -0.77)                           |
| p-value for interaction <sup>a</sup>                         |                  | 0.08                                     | 0.37                      | 0.60                  | 0.28                                             | 0.35                                          | 0.29                                          |

Estimates represent differences in change in cognitive test scores in people with a stroke or TIA as compared to people without stroke or TIA, with 95% confidence intervals. Change in cognition is defined as cognition at follow-up, adjusted for baseline cognition. A higher score indicates a better cognitive performance for all tests (scores), except the Stroop test (time taken to finish the task, in seconds) in which a higher score indicates a worse performance. Estimates are adjusted for age, sex, study cohort, time between the two examination dates, body mass index, smoking, total cholesterol, high-density lipoprotein cholesterol, lipid-lowering medication use, systolic blood pressure, diastolic blood pressure, blood pressure-lowering medication use, and diabetes mellitus type 2.

<sup>a</sup>Interaction between presence of stroke or TIA and educational level for the risk of dementia.

LDST = Letter-Digit Substitution Task; VFT = Verbal Fluency Test; 15-WLT = 15-Word Learning Test; n = number of people with a stroke or TIA; N = total number of persons with at least one cognitive test.
