# Supplementary material
Source: publisher figshare collection journal article supplement (https://karger.figshare.com/articles/dataset/_/5129317)
Supplement: Supplementary file 2 [file 1]

**Supplement Table 1. Comparison of baseline characteristics of participants included and not included in the analyses.**

| Characteristics                              | Participants        |                                                 |                                               |                                                   |
|----------------------------------------------|---------------------|-------------------------------------------------|-----------------------------------------------|---------------------------------------------------|
|                                              | Excluded<br>N=2,364 | Included in<br>dementia<br>analyses<br>N=12,561 | Included in<br>cognition<br>analyses<br>5,588 | Not included in<br>cognition<br>analyses<br>6,973 |
| Age, years                                   | 72.8 (12.3)         | 64.7 (9.6) <sup>a</sup>                         | 63.1 (8.8)                                    | 72.6 (11.0) <sup>b</sup>                          |
| Women                                        | 1,496 (63.3)        | 7,327 (58.3) <sup>a</sup>                       | 3,219 (57.6)                                  | 4,108 (58.9)                                      |
| Body mass index, kg/m <sup>2</sup>           | 26.6 (4.2)          | 26.9 (4.1) <sup>a</sup>                         | 27.7 (4.2)                                    | 27.6 (4.5)                                        |
| Smoking                                      |                     |                                                 |                                               |                                                   |
| Never                                        | 730 (36.1)          | 4,090 (32.7) <sup>a</sup>                       | 1,614 (29.2)                                  | 943 (27.7)                                        |
| Former                                       | 745 (36.9)          | 5,428 (43.4) <sup>a</sup>                       | 2,851 (51.6)                                  | 1,753 (51.5)                                      |
| Current                                      | 545 (27.0)          | 2,976 (23.8) <sup>a</sup>                       | 1,064 (19.2)                                  | 705 (20.7)                                        |
| Total cholesterol, mmol/L                    | 6.0 (1.3)           | 6.2 (1.2) <sup>a</sup>                          | 5.6 (1.0)                                     | 5.5 (1.0) <sup>b</sup>                            |
| High-density lipoprotein cholesterol, mmol/L | 1.3 (0.4)           | 1.4 (0.4) <sup>a</sup>                          | 1.4 (0.4)                                     | 1.4 (0.4)                                         |
| Lipid lowering medication                    | 245 (10.5)          | 1,187 (9.4) <sup>a</sup>                        | 1,185 (21.3)                                  | 765 (22.1)                                        |
| Systolic blood pressure, mmHg                | 141.6 (23.3)        | 138.0 (21.5) <sup>a</sup>                       | 139.6 (20.6)                                  | 149.2 (23.7) <sup>b</sup>                         |
| Diastolic blood pressure, mmHg               | 75.8 (13.1)         | 77.4 (11.8) <sup>a</sup>                        | 81.4 (10.7)                                   | 80.1 (11.9) <sup>b</sup>                          |
| Blood pressure lowering medication           | 609 (25.9)          | 2,794 (22.3) <sup>a</sup>                       | 1,426 (25.5)                                  | 1,293 (18.5) <sup>b</sup>                         |
| Mini Mental State Examination, points        | 24.1 (5.8)          | 27.8 (1.8) <sup>a</sup>                         | 28.1 (1.7)                                    | 26.9 (3.1) <sup>b</sup>                           |
| Diabetes mellitus type 2                     | 236 (11.4)          | 753 (6.0) <sup>a</sup>                          | 525 (9.5)                                     | 1,191 (30.1) <sup>b</sup>                         |

Values are means (standard deviation) or counts (percentage).

<sup>a</sup> Significantly different (P-value<0.05) from persons in the excluded group.

<sup>b</sup> Significantly different from the group not included in the cognition analysis.
